# Supplementary material for: Preoperative inflammatory markers of NLR and PLR as indicators of poor prognosis in resectable HCC
Source: PeerJ. 2019 Oct 14;7:e7132. doi: 10.7717/peerj.7132 (PMC6796955; doi:10.7717/peerj.7132)
Supplement: Supplemental Information 1 [file peerj-07-7132-s001.xlsx]

## Sheet: RAW data
Paitents id	WBC	PLT	Neutrophil	Lymphocyte	Monocyte	Albumin	total bilirubin	direct bilirubin	ALT	AST	creatinine	prothrombin time	APTT	AFP	HBV	DFS	DFS status	OS	OS status	TNM	BCLC	tumor number	differentation	tumor size	satellite nodules	Tumor capsular	cirrhosis	age	sex	Hospital stay
1	7.5	181	4.5	2.4	0.5	41.2	27.6	12	133	79	100.6	13.45	30.3	>20ng/ml	presence	33	1	42	1	I	0	signal	iii-iv	1.5	absence	absence	presence	36	M	12.0127
2	5.3	107	2.9	1.9	0.5	37.4	16.6	4.1	48.2	37	75.6	9.105	41.1	>20ng/ml	presence	15	1	20	1	III	B	mutiple	i-ii	7	absence	absence	presence	64	M	8.66664
3	5.9	188	2.904	1.2	0.5	34.8	5.9	2.3	27.6	27.6	116.4	13.1	33.5	≤20ng/ml	absence	5	1	11	1	III	B	mutiple	iii-iv	7	absence	presence	absence	71	M	15.7737
4	4	97	1.6	1.8	0.5	42.1	16.9	7.3	112	62.1	88	13.2	34.6	>20ng/ml	presence	20	1	21	1	I	0	signal	i-ii	1.5	absence	presence	presence	56	M	10.0396
5	2.4	182	0.7	1.4	0.2	41.3	9.9	1.6	25.1	28.2	70	12.4	37.4	>20ng/ml	presence	30	1	33	1	I	A	signal	i-ii	4.5	absence	absence	absence	47	M	6.78303
6	5.8	192	5.408	1.6	0.4	44.4	11.4	4.2	55.3	47	90	13.9	33.5	>20ng/ml	presence	31	1	25	1	III	B	mutiple	iii-iv	7	absence	absence	presence	45	M	17.113
7	6.2	229	3.5	1	0.5	38.6	10.7	5	100.8	55.8	90	12.5	31.8	>20ng/ml	presence	13	1	24	1	II	A	mutiple	i-ii	2.7	absence	absence	presence	47	M	18.9934
8	3.1	71	2	1.4	0.4	30.1	0.5	2.2	17.4	29.2	48.5	13.3	39.7	>20ng/ml	presence	50	1	60	0	I	A	mutiple	i-ii	2.5	absence	absence	presence	61	M	18.9229
9	4.6	47	2.3	1.3	0.4	43.2	11.6	5.3	44.8	49.4	78.2	11.72	32.5	>20ng/ml	presence	11	1	12	1	I	A	signal	iii-iv	4	absence	presence	presence	62	F	13.0479
10	7.5	213	5.7	1.2	0.4	49.1	21	8.6	42.9	31.2	102.3	12.8	30.9	>20ng/ml	presence	6	1	19	1	III	B	mutiple	i-ii	9	absence	absence	presence	37	M	12.9714
11	8.8	249	4.8	3.2	0.6	62.6	7	2.4	52	46	71.4	11.8	32.7	>20ng/ml	presence	11	1	11	1	III	C	signal	i-ii	9	absence	presence	absence	58	M	21.0503
12	6.8	178	4.6	1.6	0.6	46.2	16	6	43	37	77.7	12.4	36.4	≤20ng/ml	presence	50	0	60	0	III	B	signal	i-ii	6	absence	absence	presence	56	M	15.0336
13	3.9	83	3.941	0.7	0.4	64	21	8.2	56	42	85.5	15	36.7	>20ng/ml	presence	17	1	26	1	III	B	mutiple	i-ii	8	absence	absence	absence	52	M	18.0484
14	4.3	356	6.37	1.3	0.1	40	15.2	7	71.5	66.01	91	12.6	32.8	≤20ng/ml	presence	7	1	13	1	III	C	signal	i-ii	16	absence	presence	presence	58	M	9.61779
15	2.4	94	1.2	0.8	0.4	39	20.7	6.7	37	34	68.4	14.1	35.5	>20ng/ml	absence	16	1	16	1	II	A	mutiple	i-ii	5	absence	absence	presence	52	M	8.17575
16	11.4	280	6.2	4.3	0.7	40	11.9	3.2	29	57	102	12.5	29.2	>20ng/ml	presence	34	1	39	1	II	A	signal	i-ii	3	absence	absence	presence	50	M	18.8923
17	4.1	174	3.861	1.3	0.3	43.6	18.4	7.7	45	40	66.8	12.6	35.7	>20ng/ml	presence	24	1	28	1	III	A	mutiple	i-ii	7	absence	absence	presence	64	F	18.7115
18	4.3	144	7.095	1.1	0.3	37.1	15.2	6.14	42.9	98.35	75	12.4	35.8	>20ng/ml	presence	16	1	25	1	III	B	mutiple	i-ii	12	presence	presence	presence	56	M	19.0531
19	4.9	116	3.1	1.5	0.3	45.5	17.1	6.9	42.9	52	94.7	13.7	33.2	>20ng/ml	presence	11	1	11	1	II	A	mutiple	i-ii	4.5	absence	presence	presence	68	M	18.6873
20	8.6	219	8.684	1.3	0.7	38.1	18.4	6.5	42.9	53	71.4	13.1	32.8	>20ng/ml	presence	13	1	29	1	I	A	signal	i-ii	8	absence	absence	presence	41	M	15.9788
21	5.6	173	3.6	1.6	0.4	40.3	8.8	3.6	42.9	54	57.3	12.7	31.1	≤20ng/ml	absence	21	1	31	1	II	A	signal	iii-iv	7	absence	absence	presence	38	F	14.8969
22	8.1	205	5.5	1.6	0.7	39	11.4	4.1	42.9	55	71.5	14.2	34.7	>20ng/ml	absence	8	1	13	1	II	A	signal	i-ii	8	absence	presence	absence	66	M	20.9385
23	5.4	188	2.6	2.2	0.5	37.7	17.3	6.2	42.9	56	116	14.9	30.1	>20ng/ml	presence	18	1	18	1	I	A	signal	iii-iv	2	absence	absence	presence	46	M	17.9727
24	8	147	6.8	1	0.3	46.3	23.3	8.1	40.8	18.8	83	12.2	33	≤20ng/ml	presence	10	1	13	1	II	A	signal	i-ii	7	absence	presence	absence	69	M	22.9742
25	7.3	128	5.2	1.5	0.6	41.4	16.5	3.9	40.8	18.8	55.1	12.7	36.9	≤20ng/ml	absence	25	1	37	0	I	A	signal	i-ii	3	absence	presence	absence	47	F	21.9638
26	7.5	268	5.4	1.3	0.8	41.7	28.5	11	42.6	52.36	79.2	14	38.4	>20ng/ml	presence	5	1	7	1	II	A	mutiple	i-ii	16	presence	presence	presence	49	M	19.2821
27	5.7	156	4.2	1	0.3	46	14.4	5.5	13.1	16.83	58	13.72	36	≤20ng/ml	presence	17	1	36	1	III	B	signal	i-ii	8	presence	presence	absence	60	M	14.6904
28	2.6	77	1.7	0.6	0.3	38.8	27.8	12.1	33.5	44.68	73.5	16.1	36.8	>20ng/ml	presence	8	1	18	1	I	A	signal	i-ii	10	absence	absence	presence	40	M	20.252
29	12.9	257	10	1.3	1.5	52.7	58.7	16.9	68	78.4	89	11.6	35.1	>20ng/ml	presence	11	1	13	1	II	A	signal	i-ii	13	absence	absence	absence	39	M	17.9989
30	3.6	246	1.8	1.3	0.4	39	8.3	3.5	23.3	35.6	56.2	14.6	31.4	>20ng/ml	presence	37	0	37	0	I	A	signal	i-ii	7.5	absence	presence	absence	29	F	24.0276
31	6.8	139	4.7	1.5	0.6	35.1	20.8	11.3	57.5	61.5	74.3	15.1	32.8	>20ng/ml	presence	27	1	38	1	I	A	signal	iii-iv	12	absence	absence	presence	59	M	14.7257
32	5.5	219	3.7	0.8	0.6	45.8	13.6	5.3	22	21.7	122.7	14.2	38	≤20ng/ml	presence	30	1	38	0	II	A	signal	i-ii	3.6	absence	absence	absence	84	M	30.2641
33	5	110	2.9	1.6	0.4	40.4	13.1	4.5	42.9	56	87	12.8	30.7	>20ng/ml	presence	13	1	16	1	II	B	mutiple	i-ii	2	absence	absence	presence	63	M	14.0352
34	5.3	170	2.2	2.4	0.4	41.3	9.7	3.8	35.4	32.7	90	13.6	33.9	>20ng/ml	presence	45	1	60	0	I	A	signal	i-ii	3	absence	absence	presence	58	M	11.7913
35	4.35	155	2.4	1.6	0.4	41.2	8.9	3.3	23.7	39.1	101	13.9	35.3	≤20ng/ml	presence	24	1	27	1	III	A	signal	i-ii	8	absence	absence	absence	53	M	8.96316
36	6.7	147	4.1	1.7	0.6	42.1	14.3	6	91.6	66.18	8.67	13.8	32.1	≤20ng/ml	presence	33	1	34	1	I	A	signal	i-ii	4	absence	presence	presence	75	M	20.7016
37	5.9	717	7.53	3	0.3	44.8	21.1	8.2	86.7	48.57	80.7	14.5	29	>20ng/ml	presence	7	1	9	1	II	A	mutiple	iii-iv	7	presence	absence	presence	57	M	20.8818
38	5.8	202	1.7	0.6	0.1	41	20.3	7.9	22.6	70.4	73.9	13.6	32.8	>20ng/ml	presence	6	1	8	1	III	B	mutiple	i-ii	17	absence	absence	presence	50	F	19.9946
39	9.1	209	3.7	1.2	0.1	39.9	7.4	3.4	58.7	62.8	130	13.4	34.9	>20ng/ml	presence	13	1	24	1	III	B	mutiple	i-ii	8	presence	absence	presence	62	M	12.2274
40	3	70	7.608	1.2	0.3	50.5	16.6	47.7	32.8	31.9	96	14.8	52.2	>20ng/ml	presence	9	1	12	1	III	C	signal	i-ii	3.5	absence	presence	presence	42	M	14.0918
41	3.4	131	3.204	0.9	0.5	39.5	6.2	2.2	14.1	39.4	80	12.4	28.4	>20ng/ml	presence	10	1	16	1	III	C	mutiple	i-ii	10	absence	presence	presence	51	M	19.0446
42	3.1	103	1.9	0.9	0.3	46.3	9	3.4	19.3	25.3	66	11.4	28.1	≤20ng/ml	presence	27	1	34	1	I	A	signal	iii-iv	8.5	absence	presence	absence	59	F	15.002
43	5.7	195	3.1	1.7	0.5	47.4	10.3	4.1	19.3	25.3	109	11.5	30.6	>20ng/ml	presence	46	1	60	0	I	0	signal	iii-iv	1.6	absence	absence	absence	37	M	11.7222
44	8.2	230	6.2	1.3	0.4	33.3	12.6	5.8	19.3	25.3	106	13.2	24.3	≤20ng/ml	absence	15	1	18	1	I	A	signal	i-ii	5	absence	absence	presence	68	M	10.7365
45	8.4	253	6.4	1.3	0.6	40.1	13.9	3.4	20.1	34.1	51	12	32.9	≤20ng/ml	presence	13	1	18	1	III	C	signal	i-ii	13	absence	presence	absence	58	M	17.9959
46	4.8	155	3.4	0.9	0.4	34	27.1	12.1	49.7	77	91	13	32.2	≤20ng/ml	presence	23	1	26	1	I	A	signal	i-ii	3.5	absence	presence	presence	72	M	13.7456
47	4.3	126	5.202	0.9	0.4	42.7	11.4	3.1	52.2	67.8	60	12.9	36.5	>20ng/ml	presence	5	1	7	1	I	A	signal	iii-iv	9	absence	presence	presence	26	F	23.0685
48	5.9	162	2.264	0.8	0.7	42.7	8.6	3.3	52.2	67.8	111	13.9	27.4	>20ng/ml	absence	24	1	38	0	I	A	signal	iii-iv	2.5	absence	absence	presence	68	M	13.7556
49	5.7	145	3.3	1.7	0.6	44.1	19.6	6.1	18.3	25.3	100	13.7	36.7	≤20ng/ml	presence	52	0	52	0	I	A	signal	i-ii	3.5	absence	presence	absence	61	M	13.9637
50	16.9	108	13.9	0.7	1.3	44.3	25.3	13.7	11	25.7	90	14.7	39.5	≤20ng/ml	presence	4	1	13	1	III	C	signal	i-ii	6	absence	absence	absence	65	F	13.0318
51	5	186	2.7	1.8	0.4	40.6	15.2	6.2	27.2	18	109	11.9	31.2	≤20ng/ml	presence	49	0	49	0	I	A	signal	iii-iv	5	absence	absence	presence	54	M	22.0385
52	7.5	123	7.008	1.2	0.5	42	11.5	3	36.1	46.1	89	12.8	37.1	>20ng/ml	presence	6	1	9	1	III	C	mutiple	iii-iv	15	absence	absence	presence	49	M	15.045
53	5.4	130	3	1.7	0.2	44.7	11.6	3.1	36.1	46.1	99.7	12.76	40.6	≤20ng/ml	absence	17	1	22	1	I	A	signal	i-ii	4.5	absence	absence	presence	48	M	17.9679
54	4.2	111	2.3	1.3	0.5	39.1	10.1	2.6	22.7	27.7	83	14.5	35.5	≤20ng/ml	presence	54	1	56	0	I	0	signal	i-ii	3.5	absence	presence	presence	62	M	15.9606
55	2.6	33	1.3	1.1	0.2	38	12.8	2.8	26.1	31.1	51.7	14	38.4	>20ng/ml	presence	16	1	24	1	I	A	signal	i-ii	2.5	absence	absence	absence	49	M	23.0016
56	4.5	202	2.7	1.5	0.3	33.1	7.2	3.2	42.1	35..7	56.8	11.6	38.4	≤20ng/ml	presence	15	1	24	1	I	A	signal	i-ii	7	absence	presence	absence	23	F	13.2441
57	4.7	126	2.4	1.6	1.5	42.9	17.8	7.2	39.4	39.1	70.6	12.7	24.7	>20ng/ml	presence	37	0	37	0	I	0	signal	i-ii	2	absence	absence	absence	56	M	16.7144
58	3	75	5.4	0.9	0.3	39.3	15.3	6.1	48.1	45.5	95	14.5	19	>20ng/ml	presence	13	1	19	1	I	A	signal	i-ii	5.5	absence	absence	presence	40	M	15.6866
59	5.2	211	3.1	1	0.6	40	18.3	6.6	112.3	82.1	61	13.3	35.5	≤20ng/ml	absence	18	1	22	1	I	A	signal	iii-iv	6	absence	presence	presence	54	M	13.7495
60	4.3	142	3.3	0.4	0.3	34.2	9.4	3.5	38.8	104.2	48	11.8	30.6	>20ng/ml	presence	7	1	9	1	II	A	signal	iii-iv	7.5	absence	presence	absence	55	F	15.0569
61	6.9	86	4.3	2	0.4	43.1	4.1	2.8	36.3	27.6	103	14.9	33.2	≤20ng/ml	presence	17	1	19	1	II	A	signal	i-ii	4.1	absence	absence	presence	35	M	18.6364
62	6.3	93	4	1.7	0.4	42.2	5.9	3.3	18.3	20.3	80.9	13.4	32.4	>20ng/ml	presence	51	0	51	0	I	0	signal	i-ii	1.8	absence	absence	absence	59	M	24.6977
63	4.5	251	2	1.8	0.6	44.4	8.4	3.7	16.4	26.7	77	12	26.7	>20ng/ml	presence	36	1	39	1	I	A	signal	iii-iv	2.5	absence	presence	presence	48	F	18.0077
64	4.7	127	9.348	1.9	0.5	41.7	18.2	4.9	31.6	37	79	12.9	30.4	>20ng/ml	presence	17	1	39	1	I	A	signal	iii-iv	5	absence	presence	presence	58	F	19.685
65	4.8	145	4.35	1.5	0.4	40.2	16.8	5.3	17.5	17.8	106	13.2	33.9	>20ng/ml	presence	27	1	40	0	II	A	signal	iii-iv	2.5	absence	absence	presence	37	M	23.0355
66	3.2	145	4.6	1.5	0.4	40.2	16.8	5.3	17.5	17.8	106	13.2	33.9	>20ng/ml	absence	8	1	11	1	III	C	mutiple	i-ii	10	absence	presence	presence	51	M	19.0446
67	3.5	81	1.9	1.2	0.3	45	12.4	4.1	45	52	90	14	33.6	>20ng/ml	presence	30	1	33	0	II	B	mutiple	i-ii	8	absence	absence	presence	21	M	13.0833
68	5.5	108	3.1	1.8	0.5	46.5	18.3	7	46	53	90	14.1	31.9	>20ng/ml	presence	17	1	21	1	I	0	signal	i-ii	1.5	absence	presence	presence	45	M	14.766
69	5.8	151	3.3	1.8	0.4	42.1	9.4	3.6	47	54	101	14	35.3	≤20ng/ml	presence	47	0	47	0	I	A	signal	i-ii	2.5	absence	absence	absence	61	M	8.77402
70	3.7	77	2.2	1	0.4	37.3	15.9	7.2	70.5	40.8	78	13.6	30.8	>20ng/ml	presence	29	1	37	0	I	A	signal	i-ii	2	absence	presence	presence	50	M	14.0735
71	4.7	127	5.302	1.1	0.4	45.3	7	2.6	71.5	41.8	103	13.2	32.6	>20ng/ml	presence	37	1	48	0	I	A	signal	i-ii	4.5	absence	absence	absence	55	M	12.7033
72	3.8	128	1.9	1.3	0.5	39.6	11.8	5	72.5	42.8	81.4	12	30.3	>20ng/ml	presence	33	1	35	1	I	A	signal	i-ii	10	absence	absence	absence	49	F	21.7583
73	3.7	146	2.5	0.8	0.3	47.1	18.3	6.5	73.5	43.8	70	12.9	30	>20ng/ml	presence	4	1	9	1	I	A	signal	i-ii	10	absence	absence	presence	68	F	15.084
74	3.7	96	2.5	0.8	0.3	40.8	11.4	4.2	29.5	30.6	98	13.5	32.7	>20ng/ml	presence	23	1	39	0	I	A	signal	i-ii	2.2	absence	presence	presence	62	M	14.7889
75	5.1	147	3.1	1.6	0.3	49.2	17.3	6.6	29.5	30.6	96	13.1	31	>20ng/ml	presence	40	0	40	0	I	A	signal	i-ii	3	absence	absence	presence	33	M	15.7778
76	4.6	316	11.595	1.5	0.4	46.7	35.3	14.6	29.5	30.6	103	13.1	30.5	>20ng/ml	presence	12	1	15	1	II	B	mutiple	i-ii	5	absence	absence	presence	45	M	25.03
77	5.9	226	3.6	1.8	0.4	43.1	9.6	3.9	45	36	70	12.3	30.5	≤20ng/ml	presence	37	0	37	0	I	A	mutiple	i-ii	3.5	absence	presence	absence	61	F	13.6847
78	3.1	54	1.7	0.9	0.3	44.4	9.6	3.8	45	36	96	12.6	32.3	>20ng/ml	presence	20	1	27	1	I	A	signal	i-ii	5	absence	absence	presence	47	M	11.6581
79	3.6	125	2.2	0.8	0.5	38.8	7	1.8	45	36	109	12	27	>20ng/ml	presence	14	1	23	1	II	B	mutiple	iii-iv	6	absence	presence	presence	64	M	24.0833
80	4.2	242	4.448	1.6	0.4	44.5	5.3	1.4	29.5	30.6	57	13.5	35.4	≤20ng/ml	presence	16	1	19	1	I	A	signal	i-ii	5.5	absence	absence	presence	12	F	23.0964
81	3.1	68	2.037	0.7	0.3	38.8	23.5	11.1	29.5	30.6	100	15.6	34	≤20ng/ml	presence	50	1	60	0	I	A	signal	i-ii	4	absence	absence	presence	39	M	18.0789
82	8.3	118	3.75	1.5	0.5	43.4	30.3	9.9	29.5	30.6	88	13.6	44.1	≤20ng/ml	presence	10	1	11	1	II	B	mutiple	i-ii	5	presence	absence	presence	45	M	22.78
83	5.2	120	2.8	1.3	0.8	37.1	12.2	4.7	40.7	55.5	82	12.5	33.8	≤20ng/ml	absence	29	1	37	1	I	A	signal	i-ii	5	absence	absence	absence	56	M	11.0419
84	6.8	134	6.777	2.7	0.6	41.9	16.9	4.8	36.7	32.1	86	13.1	27.3	≤20ng/ml	presence	23	1	31	1	I	A	signal	i-ii	2.5	absence	absence	presence	64	M	27.0276
85	4.9	140	3.4	0.9	0.5	41.1	11.2	4.3	25.1	27.8	89.6	13.63	32.6	≤20ng/ml	presence	21	1	23	0	II	B	mutiple	i-ii	6	absence	absence	absence	61	M	16.9704
86	6.7	155	3.5	2	0.6	40.3	19.5	5.8	29.6	26.6	61.9	13.7	34.6	≤20ng/ml	presence	50	0	50	0	I	A	signal	i-ii	5.7	absence	absence	presence	60	M	16.9704
87	5.6	264	3.7	1.4	0.4	40.1	11.5	4.6	29.1	20.4	75.5	14	47.1	>20ng/ml	presence	13	1	18	1	II	A	signal	i-ii	2.96	absence	absence	presence	47	M	23.0624
88	5.6	108	9.75	1.5	0.4	46.6	17.6	5.9	29.1	20.4	77.1	15	29.3	>20ng/ml	presence	26	1	39	1	II	A	signal	i-ii	1.7	absence	absence	presence	51	M	18.9807
89	4.4	111	2	2.1	0.2	50.7	13.5	6.3	29.1	20.4	78.9	13.2	32.7	>20ng/ml	presence	41	1	45	0	I	A	signal	i-ii	2	absence	presence	presence	28	M	25.43
90	6.1	123	3.4	2.1	0.4	46.9	20.4	7.6	29.1	20.4	112	13.2	29.9	>20ng/ml	presence	33	1	37	1	I	0	signal	i-ii	1.5	absence	absence	presence	68	M	14.9615
91	4.1	60	2.3	1.3	0.4	40.7	10	2.5	38	41	74	12.8	29.6	>20ng/ml	absence	35	1	39	0	II	B	mutiple	i-ii	2.5	absence	absence	presence	63	M	14.3001
92	5.4	473	3.3	1.5	0.3	39.3	5.8	2.5	39	42	88	13.2	38.1	≤20ng/ml	presence	15	1	25	1	I	A	signal	i-ii	3.5	absence	absence	presence	51	M	14.9705
93	5.8	165	3.2	1.9	0.5	41.2	17.5	6.4	40	43	81	13	32.5	>20ng/ml	presence	22	1	31	1	I	A	signal	i-ii	6	absence	absence	presence	34	M	15.0305
94	5.3	151	3.8	1.2	0.2	50.2	9.4	4.3	41	44	92	12.9	34	≤20ng/ml	presence	27	1	38	1	I	A	signal	i-ii	4	absence	presence	presence	50	M	17.0273
95	3.5	113	2.1	1	0.3	41	10.9	3.9	42	45	70.2	12.9	32.9	>20ng/ml	presence	10	1	15	1	I	A	signal	i-ii	3.8	absence	presence	presence	57	M	14.0085
96	5.1	103	3.2	1.3	0.5	44.5	7.4	5.4	43	46	88	13.7	31.9	≤20ng/ml	presence	40	0	40	0	I	A	signal	i-ii	5	absence	presence	presence	37	M	16.9279
97	6.7	203	4.1	1.9	0.5	41.7	9.3	3.6	24	44.6	74	13.1	34.2	>20ng/ml	presence	8	1	9	1	III	B	mutiple	iii-iv	12	presence	absence	presence	46	F	15.0011
98	8.3	159	5.9	1.6	0.6	38.8	10	1	25	45.6	71.9	12.9	29.7	>20ng/ml	presence	26	1	40	1	I	A	signal	i-ii	5	absence	absence	absence	43	F	12.9864
99	4.4	136	2.2	1.6	0.4	40.9	14.6	5.8	26	46.6	93	14.2	22.7	>20ng/ml	presence	21	0	36	1	I	A	signal	iii-iv	3	absence	absence	presence	49	M	10.7771
100	8.6	246	6	1.9	0.6	43.2	7.9	2.7	36.6	38.2	89.2	13.2	31.6	≤20ng/ml	presence	21	1	17	1	III	C	signal	i-ii	8	absence	absence	absence	57	M	12.0366
101	5.2	90	3.6	1.2	0.3	38.3	9.4	3.3	38.9	35.5	56.7	13.1	32.3	≤20ng/ml	presence	30	1	40	1	I	A	signal	i-ii	3.5	absence	presence	absence	61	M	13.0654
102	7.5	153	6.2	0.7	0.5	37.7	9.1	3.6	9.1	23.8	88.3	14.73	41.7	≤20ng/ml	presence	9	1	12	1	II	A	signal	i-ii	4	absence	absence	absence	80	M	15.9584
103	4.7	242	2.3	1.9	0.4	42.5	15.9	5.1	23.5	55.3	77	12.8	33.4	>20ng/ml	presence	11	1	11	1	I	B	mutiple	iii-iv	12	presence	presence	absence	30	F	9.95647
104	2.7	59	3.983	0.7	0.1	41.2	10.2	4.1	23.5	55.3	98	13.1	27.3	>20ng/ml	presence	4	1	10	1	III	B	mutiple	i-ii	10	absence	absence	presence	60	M	15.0166
105	5.9	113	2.9	0.7	0.5	37.5	4.1	2.5	24.3	23.4	90	14.1	32.2	>20ng/ml	presence	28	1	36	0	I	A	signal	i-ii	5	absence	absence	presence	44	M	15.9738
106	7.6	154	11.45	2.5	0.6	36.2	5.4	2.8	52.5	33.3	79.5	13	32.8	>20ng/ml	presence	5	1	9	1	I	A	signal	iii-iv	6	absence	absence	absence	32	M	15.3804
107	6.2	153	3.9	1.7	0.5	40	6.8	3	33.8	29.2	80	12.3	28.2	≤20ng/ml	presence	11	1	13	1	I	A	signal	i-ii	3.5	absence	absence	absence	60	M	16.9391
108	9.7	223	8.28	2.4	0.9	43	12.1	4.9	71.7	57.7	106.9	12.5	32.2	≤20ng/ml	presence	6	1	13	1	III	C	signal	i-ii	7.5	absence	absence	absence	56	M	17.0034
109	4.8	95	2.5	1.5	0.5	37	17.2	6.7	72.7	58.7	89	14.2	33.7	>20ng/ml	presence	40	1	45	0	I	A	signal	i-ii	3.5	absence	absence	presence	51	M	13.2958
110	7.9	161	5.8	1.1	0.9	33	19.9	8	73.7	59.7	110.3	13.6	35	>20ng/ml	presence	9	1	12	1	II	B	signal	i-ii	7	absence	absence	presence	52	M	13.0726
111	9.7	139	6.9	2	0.7	39.9	9.6	3.6	74.7	60.7	82	12.2	30.9	>20ng/ml	presence	27	1	38	1	I	A	signal	i-ii	3	absence	absence	presence	50	M	17.0298
112	3.3	98	1.7	1.1	0.4	40.6	13.2	4.8	30.9	30.1	83	13.1	35.7	≤20ng/ml	absence	18	1	30	1	II	A	signal	i-ii	3.5	absence	presence	presence	71	M	19.6982
113	5.6	308	4.1	1.1	0.3	39.2	11.5	5.4	31	30.3	86	11.9	34.6	≤20ng/ml	presence	18	1	26	0	I	A	signal	i-ii	12	absence	presence	presence	52	M	14.6847
114	4.3	99	2.8	1	0.4	40.2	10.6	4.6	31	30.3	96.2	12.3	30.2	≤20ng/ml	presence	31	1	39	1	I	A	signal	i-ii	5	absence	absence	presence	55	M	30.6817
115	6.7	320	5.3	0.9	0.3	42.7	10.4	4.6	29.3	30.1	71.5	12.7	30.1	≤20ng/ml	absence	5	1	24	1	III	C	signal	i-ii	4	absence	absence	absence	40	F	18.0068
116	4.9	116	2.7	1.4	0.6	41	12.1	5.1	258.6	201.3	83.5	12.4	29.5	≤20ng/ml	presence	30	1	39	1	I	A	signal	i-ii	3.5	absence	absence	presence	61	M	13.2656
117	3.7	135	4.4	1	0.2	44.5	8.5	3.5	46	82	88.5	11.4	35.7	>20ng/ml	presence	2	1	6	1	III	C	signal	i-ii	8	absence	presence	presence	51	M	13.9132
118	5.3	151	3.3	1.4	0.5	40.1	13.7	4.9	47	29	99.1	12.6	48.6	>20ng/ml	presence	8	1	11	1	II	B	mutiple	iii-iv	16	absence	absence	absence	36	M	10.7016
119	4.3	220	3.64	1.4	0.4	37	10	4..7	11.8	16.3	78	13.2.	34	≤20ng/ml	absence	10	1	11	1	I	A	signal	i-ii	11	presence	presence	presence	44	F	8.76209
120	5	96	3.3	1.1	0.4	41.2	9.4	4	33.9	70.6	93.1	13.9	28.7	>20ng/ml	presence	19	1	37	1	III	C	mutiple	i-ii	3.5	absence	absence	presence	45	M	18.2853
121	4.4	119	5.82	1.2	0.3	42.2	17.7	6.7	19.5	38.9	75	14.9	44	>20ng/ml	presence	21	1	30	1	III	C	signal	iii-iv	6	absence	presence	presence	51	F	17.5753
122	5	189	2.9	1.7	0.3	42.1	12.1	4.8	15.5	28.6	67.6	11.7	28.5	>20ng/ml	presence	6	1	10	1	II	B	mutiple	iii-iv	10	absence	absence	absence	34	F	13.0048
123	6	122	5.304	1.7	0.5	41.5	12	5.1	52.1	41.4	90.4	13.2	33.8	>20ng/ml	absence	15	1	24	1	III	C	mutiple	i-ii	15	absence	absence	presence	25	M	9.90514
124	6.1	166	5.706	1.8	0.4	49.3	15	3.9	45.3	47.5	86	13.3	37.5	>20ng/ml	presence	15	1	25	1	III	C	signal	i-ii	8	absence	absence	absence	43	M	17.1001
125	6	183	8.398	1.7	1	30.7	6.6	3.5	33.4	51.6	84	12.7	43.1	≤20ng/ml	presence	7	1	11	1	III	C	signal	iii-iv	7	absence	absence	absence	51	M	11.9343
126	3.8	150	1.9	1	0.8	39.7	8.9	3.3	33.4	51.6	76.1	12.2	30.8	≤20ng/ml	presence	9	1	11	1	II	B	mutiple	iii-iv	5	presence	absence	presence	44	M	17.9602
127	9.1	287	7	1.2	0.7	41.4	154.2	82.3	280.8	227.4	68	13.7	32.9	≤20ng/ml	absence	13	1	24	1	III	A	signal	iii-iv	0.8	absence	presence	absence	49	F	12.7562
128	3.6	106	1.5	1.7	0.3	39.6	6.2	2.8	60.2	54	105	13.4	32.7	>20ng/ml	presence	13	1	22	1	I	A	signal	i-ii	3	absence	absence	presence	57	M	12.98
129	3.2	107	1.6	1.2	0.4	40.6	11.7	3.7	22.9	33.3	85	14	29.1	>20ng/ml	presence	8	1	10	1	III	B	mutiple	i-ii	9	absence	absence	absence	50	F	18.2501
130	7.3	247	6.38	2	0.6	38.7	9.6	2.2	89.7	43.2	92	14.1	32.5	≤20ng/ml	presence	21	1	37	1	I	A	signal	i-ii	6.5	absence	absence	absence	46	M	15.0768
131	9.5	191	5.5	3	0.7	41	13	3.6	89.7	43.2	98	12	34.8	>20ng/ml	presence	40	0	40	0	I	A	signal	i-ii	3	absence	absence	presence	40	M	14.0346
132	3.3	71	1.6	1.3	0.4	38.2	15	5.1	27.2	36.3	85	14	34.3	≤20ng/ml	presence	46	0	46	0	II	B	mutiple	i-ii	9	absence	presence	presence	64	M	17.1181
133	13	401	6.076	2.8	1	44.9	12.6	4.8	28.2	37.3	111.4	13.1	26.2	>20ng/ml	absence	37	1	41	1	I	0	signal	i-ii	1	absence	absence	presence	78	M	18.0946
134	5.1	83	2.9	1.7	0.4	35.6	36	26.9	29.2	38.3	61.7	14.5	32	>20ng/ml	absence	17	1	28	0	I	A	signal	i-ii	3.5	absence	absence	presence	49	M	15.0247
135	9.4	154	6.4	2.1	0.6	36.6	12.7	4.7	30.2	39.3	98.9	13.4	33	>20ng/ml	presence	37	1	40	0	II	A	signal	iii-iv	3	absence	absence	presence	67	M	18.9775
136	7.2	175	3.5	3	0.9	35.4	43.1	26.2	84.7	88.04	94.6	14.9	35.4	>20ng/ml	presence	52	0	52	0	I	0	signal	i-ii	0.5	absence	absence	absence	51	M	35.9935
137	3.2	175	3.7	1.6	0.9	35.4	43.1	26.2	84.7	88.04	94.6	14.9	35.4	>20ng/ml	presence	28	1	32	1	I	A	signal	i-ii	5.5	absence	absence	presence	60	M	12.0466
138	6.2	78	4.2	1.3	0.3	41.4	16.7	4.2	64	56	71	12.1	23.9	>20ng/ml	presence	15	1	19	1	III	C	mutiple	i-ii	1.5	absence	absence	presence	59	F	18.7873
139	10.6	349	7.6	1.7	1.3	38.2	26.8	11.4	117.5	63.1	67	12.3	29.8	>20ng/ml	presence	11	1	12	1	I	A	signal	iii-iv	7	absence	presence	absence	48	M	12.1013
140	6	146	2.899	1.3	0.4	35.7	10.9	4.9	22.1	21.2	80.1	13	31.2	≤20ng/ml	presence	27	1	35	0	I	A	signal	i-ii	4	absence	absence	presence	59	M	14.015
141	6.9	158	4	2	0.5	45.3	14.3	3.5	35.4	23.3	85	13	32.4	>20ng/ml	presence	16	1	21	1	II	B	mutiple	i-ii	5.7	absence	absence	presence	42	M	20.9929
142	5.5	126	7.308	2.1	0.4	44.3	16.5	5.7	30	31.8	74.4	13.4	34.7	>20ng/ml	absence	8	1	17	1	II	B	mutiple	iii-iv	3	absence	absence	presence	54	M	19.013
143	3.8	149	3.303	0.9	0.4	41.3	18.1	7.5	31	32.8	92.8	13.6	27	≤20ng/ml	presence	25	1	40	0	I	A	signal	i-ii	4	absence	absence	presence	49	M	9.80772
144	5.1	84	8.9	2	0.4	46.5	20.9	7.3	32	33.8	110	14.9	31	>20ng/ml	presence	54	1	60	0	I	A	signal	iii-iv	3	absence	absence	presence	57	M	17.0244
145	4.9	126	2.8	1.7	1.3	42.3	7.1	1.7	33	34.8	86	14.3	31.5	>20ng/ml	presence	21	1	23	1	II	B	mutiple	i-ii	3.3	absence	presence	presence	26	M	14.0633
146	4	121	2	1.5	0.3	45.2	20.6	8.3	34	35.8	114	14.7	31.5	>20ng/ml	presence	10	1	11	1	II	B	mutiple	iii-iv	5	absence	absence	presence	36	M	15.0268
147	5.6	142	3.5	0.5	0.2	47.2	17.1	5.4	35	36.8	96	12.3	29.8	>20ng/ml	presence	21	1	26	1	I	A	signal	i-ii	5	absence	absence	presence	46	M	10.079
148	6.7	469	3.8	2.2	0.6	41.5	9.6	2	67.4	55.9	86	12.1	31.3	≤20ng/ml	presence	17	1	23	1	II	B	mutiple	i-ii	7.1	absence	absence	presence	59	M	18.9798
149	2.6	84	0.9	1.4	0.2	36.3	13.8	4	37.7	38.7	81	16.7	41.1	>20ng/ml	presence	21	1	29	1	I	A	signal	i-ii	4	absence	presence	presence	51	M	18.0918
150	4.1	130	2.7	0.7	0.5	42.3	13.9	5.6	37.7	38.7	88	13.9	36	>20ng/ml	absence	5	1	7	1	I	A	signal	i-ii	14	absence	absence	presence	27	M	17.0717
151	6.5	85	3.5	1.6	0.7	35.1	17.2	6.3	27.9	26.4	100	13.9	37.4	≤20ng/ml	presence	9	1	11	1	II	B	mutiple	i-ii	11	presence	absence	presence	48	M	11.688
152	5.3	200	2.6	1	0.5	39.4	9	2.7	18.4	28.6	93	13	36.6	≤20ng/ml	absence	7	1	9	1	II	B	mutiple	iii-iv	12	absence	absence	presence	50	M	13.0756
153	4.3	155	2.7	1.21	0.4	37	11.9	3.9	19.4	29.6	103	13.3	36.1	>20ng/ml	presence	9	1	11	0	I	A	signal	i-ii	5	absence	presence	absence	59	M	14.7789
154	5	91	2.6	1.7	0.6	38.7	7.2	3.3	20.4	30.6	75.2	14.2	38.1	>20ng/ml	presence	8	1	17	1	I	A	signal	i-ii	5.5	absence	presence	presence	32	M	17.0783
155	4.3	324	3.1	0.7	0.4	36.4	6.3	2.8	21.4	31.6	70	12.4	35.6	>20ng/ml	presence	13	1	15	1	I	A	signal	iii-iv	5.5	absence	presence	presence	58	M	16.7469
156	6.4	164	5.695	1.7	0.4	50.5	16.8	6	22.4	32.6	78	13.5	32.7	>20ng/ml	presence	8	1	9	1	II	B	mutiple	i-ii	7	presence	presence	presence	45	M	18.0485
157	5.8	198	3.2	2	0.4	36	8.9	3.3	23.4	33.6	83	12.8	32	>20ng/ml	presence	9	1	10	1	III	C	signal	i-ii	8	absence	presence	presence	44	M	16.7255
158	3.1	52	2	0.7	0.3	44.5	14.9	5.3	24.4	34.6	70	14.5	35	>20ng/ml	presence	27	1	39	1	I	A	signal	i-ii	4	absence	absence	presence	60	M	16.0833
159	7.2	226	4.7	1.8	0.5	45.6	16.1	5.4	25.4	35.6	81	12.4	30.2	>20ng/ml	presence	31	1	35	1	I	A	signal	iii-iv	4	absence	absence	absence	45	M	22.3754
160	4.4	109	3	1	0.3	41.5	5.5	2.1	34.8	32.7	77.5	11.9	35.8	≤20ng/ml	absence	8	1	10	1	III	B	mutiple	i-ii	10	absence	presence	presence	36	M	18.9845
161	2.2	59	2.943	0.9	0.2	38.9	7.3	3.6	39.7	38.2	66	14.3	34.6	≤20ng/ml	presence	28	1	38	1	II	B	mutiple	i-ii	3	absence	presence	presence	38	M	17.7036
162	3.3	61	1.5	1.4	0.2	43.1	12.1	4	20	19.8	84	14	33.4	>20ng/ml	presence	50	0	50	0	I	0	signal	i-ii	1	absence	absence	presence	42	M	10.0471
163	3.6	89	1.6	1.4	0.5	38.4	11.7	4.2	32	38	76	14.1	37.4	≤20ng/ml	presence	32	0	40	1	I	A	signal	i-ii	2.5	absence	absence	presence	41	M	19.0833
164	2.6	63	1.3	0.9	0.3	37	24	10.4	61.7	48.6	86	14.4	33	>20ng/ml	presence	10	1	16	1	I	A	signal	i-ii	2	absence	absence	presence	49	M	14.9622
165	5.9	196	2.704	1.3	0.5	46.3	27.2	10.8	38.5	22.58	115	12.5	28.9	≤20ng/ml	presence	16	1	23	1	I	A	signal	i-ii	3.5	absence	absence	presence	46	M	8.05118
166	5.9	135	3.4	1.6	0.4	44.8	15.5	5.5	54.9	38.7	89	13.1	46.9	>20ng/ml	presence	30	0	30	0	I	A	signal	i-ii	8.5	absence	absence	presence	41	M	19.0179
167	5.9	154	2.6	2.5	0.5	41.3	28.4	14.4	184.7	152.1	112	13.8	34	>20ng/ml	presence	17	1	22	1	I	A	signal	i-ii	3	absence	absence	presence	52	M	15.7192
168	5.9	300	3.4	1.9	0.6	39.4	14	6.1	56	67	84.3	13.4	29.7	≤20ng/ml	presence	44	0	44	0	II	B	mutiple	i-ii	7	absence	absence	presence	63	M	11.027
169	7.1	226	4.3	1.6	0.6	44.6	26.3	12.7	56	67	76	12	30.1	≤20ng/ml	presence	43	0	45	0	I	A	signal	i-ii	2.5	absence	absence	presence	60	M	18.9658
170	5.8	106	3.9	1.3	0.6	40.9	20.8	8.6	81.9	89.1	92	13.2	39.2	>20ng/ml	presence	2	1	8	1	III	C	signal	i-ii	10	absence	absence	presence	38	M	17.0484
171	4.3	224	5.34	1.2	0.5	49.8	11.4	4.6	24.9	70.5	70	13.5	35.3	>20ng/ml	presence	5	1	7	1	III	C	signal	iii-iv	10	absence	absence	presence	45	F	14.9672
172	4.4	184	4.668	1.2	0.3	43.2	23	9.8	23	27.9	80	14.2	33.3	>20ng/ml	presence	4	1	12	1	III	C	mutiple	i-ii	8	presence	absence	presence	40	M	12.7215
173	6.1	176	3.5	2.1	0.4	40.1	9.3	2.8	35	78	89	13.3	32.8	>20ng/ml	presence	41	0	41	0	I	A	signal	iii-iv	3	absence	absence	presence	26	M	8.97681
174	3	93	1.9	0.7	0.3	34.3	9.6	2.9	102.7	110.7	96	13.3	41.9	>20ng/ml	presence	9	1	10	1	III	C	signal	i-ii	10	absence	presence	presence	42	M	15.242
175	4.4	160	4.932	0.9	0.4	38.5	12.2	4.8	41.9	69.5	89	13.72	35.9	>20ng/ml	presence	6	1	8	1	III	C	mutiple	i-ii	16	absence	presence	presence	50	M	9.04964
176	5.9	148	3.2	0.7	0.5	35.7	5.7	2.1	48.8	43.7	92.2	11.3	30.2	>20ng/ml	presence	5	1	18	1	I	A	signal	i-ii	3.5	absence	absence	presence	53	M	16.0325
177	5.7	128	7.47	1.8	0.5	46.3	31.8	9.6	41.7	43.7	110	15	32.5	>20ng/ml	presence	26	1	36	1	I	A	signal	i-ii	9	absence	presence	presence	56	M	15.0155
178	4.7	126	3	1.2	0.3	46.6	4.2	1.7	23.6	29	107	12	29.6	≤20ng/ml	absence	45	0	45	0	I	A	signal	i-ii	4	absence	absence	absence	65	M	15.2526
179	5.4	249	1.5	0.7	0.3	45.5	14.4	4.1	18.1	20.8	89	12.6	28.1	≤20ng/ml	absence	21	1	32	0	I	A	signal	i-ii	6	absence	absence	presence	65	M	9.67062
180	5.9	211	6.534	1.1	0.4	46.6	12.5	4.5	15.4	33.7	100	12.8	24.7	>20ng/ml	presence	5	1	9	1	III	C	mutiple	iii-iv	9.5	absence	absence	presence	72	M	15.0328
181	7.2	194	4.3	1.2	0.4	41.9	21.6	10.3	16.4	34.7	69.8	13.3	29	≤20ng/ml	presence	14	1	36	1	I	A	signal	i-ii	3	absence	absence	presence	39	M	14.0402
182	5.9	378	3.3	2.1	0.4	45.3	17.9	7.5	17.4	35.7	110	12.4	34.4	>20ng/ml	presence	17	1	24	1	I	A	signal	iii-iv	7.5	absence	absence	absence	67	M	11.071
183	4.8	103	2.1	2.1	0.5	43.7	11.4	4.8	18.4	36.7	84	12.3	28.9	≤20ng/ml	presence	42	0	42	0	I	A	signal	i-ii	4	absence	absence	presence	58	M	8.77914
184	4.9	124	2.3	2	0.5	39.6	8.3	3.2	38	45	95	13.1	35.4	>20ng/ml	presence	33	1	37	1	I	A	signal	i-ii	4	absence	absence	presence	48	M	14.0217
185	5.1	75	9.456	1.6	0.5	41.1	7.9	2.8	39	46	85	13.2	30.7	≤20ng/ml	presence	27	1	41	0	I	A	signal	iii-iv	3.5	absence	absence	presence	50	F	17.9734
186	5.8	174	8.602	1.7	0.4	47.4	10	2.9	40	47	116.2	13	36.2	>20ng/ml	presence	16	1	37	1	I	A	signal	i-ii	4	absence	absence	absence	40	M	11.9523
187	6	129	7.356	1.2	0.4	46.1	20.9	8.9	41	48	92.2	13	33.4	>20ng/ml	presence	3	1	7	1	I	A	signal	i-ii	13	absence	absence	presence	38	M	14.0118
188	7.2	252	6.808	2.3	0.3	47.4	12.1	5	36	74	74	11.9	30.3	>20ng/ml	presence	14	1	16	1	III	C	signal	i-ii	9	absence	absence	absence	16	M	11.0291
189	4.4	106	2	1.2	0.9	44.7	30.4	13	37	75	72	14.2	45.8	>20ng/ml	absence	36	1	36	1	I	A	signal	i-ii	7	absence	absence	absence	38	F	17.0211
190	8.7	136	6.5	1.3	0.8	44.4	14.2	5	38	76	68	11.9	37.2	>20ng/ml	presence	6	1	11	1	I	A	signal	i-ii	8.5	absence	absence	absence	43	M	10.0359
191	6.6	155	4.4	1.4	0.6	38.3	7.5	3.1	39	77	90.8	12.8	28.7	>20ng/ml	presence	33	1	36	1	I	A	signal	i-ii	6	absence	absence	presence	52	M	11.0046
192	4.1	137	4.624	1.6	0.4	37.4	14	6.3	49	35.3	111	14.6	32.3	≤20ng/ml	presence	30	1	40	1	II	B	mutiple	i-ii	6	absence	absence	presence	35	M	13.0495
193	2.5	85	1.3	0.8	0.3	40.9	13.5	6.8	4.9	12.3	63	12.9	34.1	>20ng/ml	presence	16	1	21	1	I	A	signal	iii-iv	3	absence	presence	presence	45	F	14.0247
194	4.5	162	6.604	1.3	0.3	46.1	11.9	5	67.2	58.2	106.4	15.9	39.2	>20ng/ml	presence	9	1	13	1	I	A	signal	iii-iv	7	absence	absence	presence	37	M	9.05453
195	5.6	337	2.4	2.5	0.5	49.9	7.9	4.3	107	50.9	107	11.9	36.5	≤20ng/ml	absence	8	1	10	1	I	A	signal	i-ii	8	presence	presence	presence	18	M	7.81082
196	5.2	216	3.5	0.9	0.6	44.4	18.7	8.8	50.8	85.1	92	12.2	30	>20ng/ml	absence	7	1	13	1	III	C	signal	i-ii	11	absence	absence	presence	62	M	14.9243
197	4.1	85	2.6	1.1	0.3	44.8	18.6	7.1	23.8	42.5	90	13.7	36.6	>20ng/ml	presence	6	1	11	1	II	B	mutiple	i-ii	8	presence	absence	presence	48	M	17.0278
198	3.2	58	1.498	0.7	0.2	42	32.2	13.6	27.7	25.6	105.4	14.1	42.9	≤20ng/ml	presence	21	1	23	1	I	A	signal	iii-iv	3.5	absence	absence	presence	65	M	13.0707
199	8.2	132	5.5	1.9	0.5	46.8	11.2	2.6	30.3	34.3	82	15.1	31.6	≤20ng/ml	absence	24	1	38	0	I	A	signal	iii-iv	5	absence	presence	absence	58	M	11.269
200	5.4	190	3.2	1.6	0.3	49.5	24.3	9.1	36	25	97	12.5	31.5	>20ng/ml	presence	29	1	32	0	I	A	signal	iii-iv	3.5	absence	absence	presence	40	M	12.995
201	9.5	205	6.8	1.3	0.9	35.1	16.8	7.3	14	75	100	14.8	34.1	≤20ng/ml	presence	17	1	24	1	I	A	signal	i-ii	11	absence	absence	presence	46	M	15.7513
202	5	156	3	1.6	0.3	45.6	18.7	8.4	33.5	26.7	103	15.5	35.8	>20ng/ml	presence	31	0	31	0	I	A	signal	iii-iv	3	absence	absence	presence	29	M	8.97602
203	11.7	318	5.096	1.3	1.2	34.63	11	4.5	56.9	61.8	82	12.4	40.2	≤20ng/ml	presence	15	1	25	1	I	A	signal	i-ii	7	absence	absence	absence	46	F	11.9978
204	7.4	315	3.7	2.9	0.5	43	10	4.1	32.1	26.5	88	11.4	35.2	>20ng/ml	presence	23	1	31	1	II	B	signal	iii-iv	6.5	absence	absence	presence	39	M	10.9815
205	7.2	221	4.6	1.8	0.6	45.4	17.2	7.1	14.7	26.7	93	12	35.2	>20ng/ml	absence	26	1	29	1	I	A	signal	i-ii	6	absence	absence	absence	51	M	12.0151
206	7.3	209	4	1.7	0.4	37.1	14.3	3.4	33.3	26.6	53	13.7	26.6	≤20ng/ml	absence	33	1	35	0	I	A	signal	i-ii	5	absence	absence	presence	57	M	13.0963
207	4.7	100	4.305	1.5	0.4	38.5	29.7	13.7	15	36	91	13.4	35.4	>20ng/ml	presence	27	1	39	1	II	B	signal	i-ii	7	absence	presence	presence	44	M	12.0574
208	5.2	112	2.5	1.8	0.5	28.3	19.5	7.6	45	56	118.2	15	35.2	>20ng/ml	absence	16	1	27	1	I	A	signal	i-ii	2.2	absence	absence	presence	44	M	8.03131
209	11.2	323	9.7	0.7	0.7	34	15.2	6.5	41	96	87	14.1	34.7	>20ng/ml	presence	6	1	13	1	III	C	signal	i-ii	11	absence	absence	absence	59	M	14.7445
210	6.9	273	4.5	1.5	0.6	37.7	12.7	5	85	64	88	13	42.6	≤20ng/ml	presence	25	1	28	1	II	B	mutiple	i-ii	7	absence	absence	presence	41	M	16.0134
211	3.9	144	4.301	1.1	0.4	38.3	11.1	4.7	41	32	122	12.8	30.6	>20ng/ml	presence	21	1	30	1	I	A	signal	i-ii	7.5	absence	absence	presence	51	M	14.0395
212	5.6	236	4.1	1	0.4	42.7	10.7	3.3	101.8	213	83	13.9	40.7	>20ng/ml	absence	13	1	37	1	I	A	signal	i-ii	5	absence	absence	presence	54	M	15.0458
213	3.6	236	4.1	1.8	0.4	42.7	10.7	3.3	101.8	213	83	13.9	40.7	>20ng/ml	absence	8	1	11	1	II	B	mutiple	i-ii	3.7	presence	presence	presence	60	M	7.0726
214	8.4	93	5.1	1.9	0.9	44.8	20.6	8.6	101.8	213	91.6	13.6	25.3	>20ng/ml	presence	21	1	32	0	I	A	signal	i-ii	1.5	absence	absence	presence	45	M	12.6956
215	8.4	302	5.3	2.1	0.9	33.9	8.7	3.6	6.8	14.9	75.4	11.1	24.2	≤20ng/ml	absence	14	1	23	1	I	A	signal	i-ii	3	absence	absence	presence	58	F	14.9617
216	4.7	109	3	1.4	0.2	39	10.4	2.9	14.3	22.6	64.1	14.3	31.7	≤20ng/ml	presence	51	1	55	1	I	A	signal	i-ii	2	absence	absence	presence	40	M	12.3097
217	4.6	191	4.68	1.3	0.5	48	15	5.96	25	45	81	12.6	34.2	≤20ng/ml	presence	13	1	25	1	III	C	signal	i-ii	7	absence	absence	presence	62	M	13.9956
218	6.3	151	7.194	1.1	0.6	37.1	7.1	2.3	89	75	72	13.1	30.9	≤20ng/ml	presence	6	1	7	1	I	A	signal	i-ii	12	absence	absence	presence	58	F	17.9288
219	4.9	306	4.396	1.4	0.4	43.2	14.1	4.1	22.8	23.6	95	12.9	22.7	>20ng/ml	presence	21	1	36	1	I	A	signal	i-ii	2	absence	absence	absence	61	M	13.0204
220	7.3	134	6.51	2.1	0.6	42.5	13.4	4.1	20.7	27.6	114	12.9	34.3	≤20ng/ml	presence	28	1	39	1	I	A	signal	i-ii	5	absence	absence	presence	45	M	13.0791
221	4.9	202	2.5	2	0.3	48.4	20.4	7.1	45	85	66	13.4	31.9	>20ng/ml	presence	14	1	20	1	I	A	signal	i-ii	5.5	absence	absence	absence	49	F	12.9303
222	9.1	180	6.1	1.6	1.2	37.6	18.9	7	78	26	91	10.9	35.3	>20ng/ml	presence	11	1	17	1	I	A	signal	i-ii	7	absence	absence	presence	56	M	11.0039
223	6.2	190	4	1.4	0.8	35	4.9	2.2	34.8	28.9	79.5	14	33.7	≤20ng/ml	presence	4	1	11	1	I	A	signal	i-ii	5.8	absence	absence	presence	61	M	12.77
224	4.9	103	3.2	0.6	0.6	41.4	9.7	3.9	35.8	29.9	86	13.4	32.7	>20ng/ml	presence	11	1	13	1	II	B	mutiple	iii-iv	11.5	presence	presence	presence	49	M	14.0727
225	9.3	213	7.4	0.9	0.9	45.8	22.1	8.5	36.8	30.9	125	12.9	31.5	>20ng/ml	presence	3	1	4	1	II	B	mutiple	i-ii	4.5	presence	presence	absence	51	M	13.9697
226	5.9	201	3.9	1.6	0.3	37.5	11.2	5.9	37.8	31.9	85	11.8	27.7	>20ng/ml	absence	19	1	32	0	I	A	signal	iii-iv	4.5	absence	absence	absence	50	M	14.0742
227	4.9	141	2.8	1.6	0.4	41	5.9	2.7	23.8	43.2	96	13	36.1	>20ng/ml	presence	13	1	22	1	I	A	signal	i-ii	5	absence	presence	presence	49	M	12.9768
228	4.5	305	7.828	1.9	0.2	46.9	18.4	6.2	40	36.4	103	13.7	26.2	>20ng/ml	presence	12	1	27	1	III	C	signal	i-ii	3	absence	absence	presence	50	M	13.8887
229	5.8	119	3.8	1.3	0.5	39.5	18.9	6.6	30.7	27.7	94	13.3	32.1	>20ng/ml	presence	29	1	38	1	I	A	signal	i-ii	2.5	absence	absence	presence	61	M	14.9651
230	4.2	309	4.745	1.3	0.3	32	12.5	4.3	15.3	29.2	66.7	13.2	26.1	>20ng/ml	presence	6	1	9	1	I	A	signal	i-ii	4.5	absence	absence	presence	48	F	14.3166
231	6	182	3.1	2.3	0.5	37.7	5.8	1.8	16.3	30.2	82	12.7	34.1	>20ng/ml	presence	9	1	12	1	I	A	signal	i-ii	12	absence	presence	absence	42	M	16.0339
232	3.8	82	2.4	0.9	0.3	45	9.8	3.4	17.3	31.2	92	14.4	33.8	>20ng/ml	presence	44	0	44	0	I	A	signal	i-ii	3	absence	presence	presence	48	M	9.03751
233	4.3	90	1.998	0.6	0.5	37.8	7.3	1.9	18.3	32.2	78	12.9	31.1	≤20ng/ml	absence	27	1	40	0	I	A	signal	i-ii	1.5	absence	absence	presence	41	F	17.0374
234	7.7	106	4.6	2.1	0.7	46.1	12.7	3.9	19.3	33.2	87	13	29.6	≤20ng/ml	presence	29	1	34	0	I	A	signal	i-ii	2	absence	absence	presence	59	M	15.0483
235	16.4	387	11.3	4.1	0.9	33.1	7.6	3.3	15.6	79.7	115.7	16.9	26.8	>20ng/ml	presence	29	1	39	1	I	A	signal	i-ii	12	absence	presence	absence	19	F	8.73554
236	4.6	165	3.2	0.9	0.4	39.3	14.3	5	10.6	33.2	97	12.6	33.5	≤20ng/ml	presence	16	1	26	1	I	A	signal	i-ii	9	absence	absence	absence	63	M	11.0836
237	4.6	65	2.4	1.7	0.3	44.2	10	2.9	29.5	26.3	83	13.2	33.1	≤20ng/ml	presence	27	1	30	1	I	A	signal	iii-iv	3	absence	absence	presence	35	M	15.0133
238	4.7	26	3.3	1	0.3	34.9	26.7	11.9	41.7	74.3	61.3	15.1	35.3	>20ng/ml	presence	26	1	42	0	I	A	signal	i-ii	1.5	absence	absence	presence	72	F	1.04977
239	4.2	106	2.3	1.3	0.5	37.5	8	3.7	25.5	27.4	73.6	12.17	42.3	>20ng/ml	presence	6	1	11	1	I	A	signal	i-ii	6.5	absence	presence	presence	49	M	13.9922
